# Supplementary material
Source: PubMed Central journal article supplement (PMC5651775)
Supplement: pnas.1711389114.sapp.pdf [file pnas.1711389114.sapp.pdf]

## **Supplementary Information**

### **Extracellular Vesicles from Human Pancreatic Islets Suppress Human Islet Amyloid Polypeptide (IAPP) Amyloid Formation**

Diana Ribeiro, Istvan Horvath, Nikki Heath, Ryan Hicks, Anna Forsl w, Pernilla Wittung-  
Stafshede

#### **Content**

Figures S1-S3

Tables S1-S2

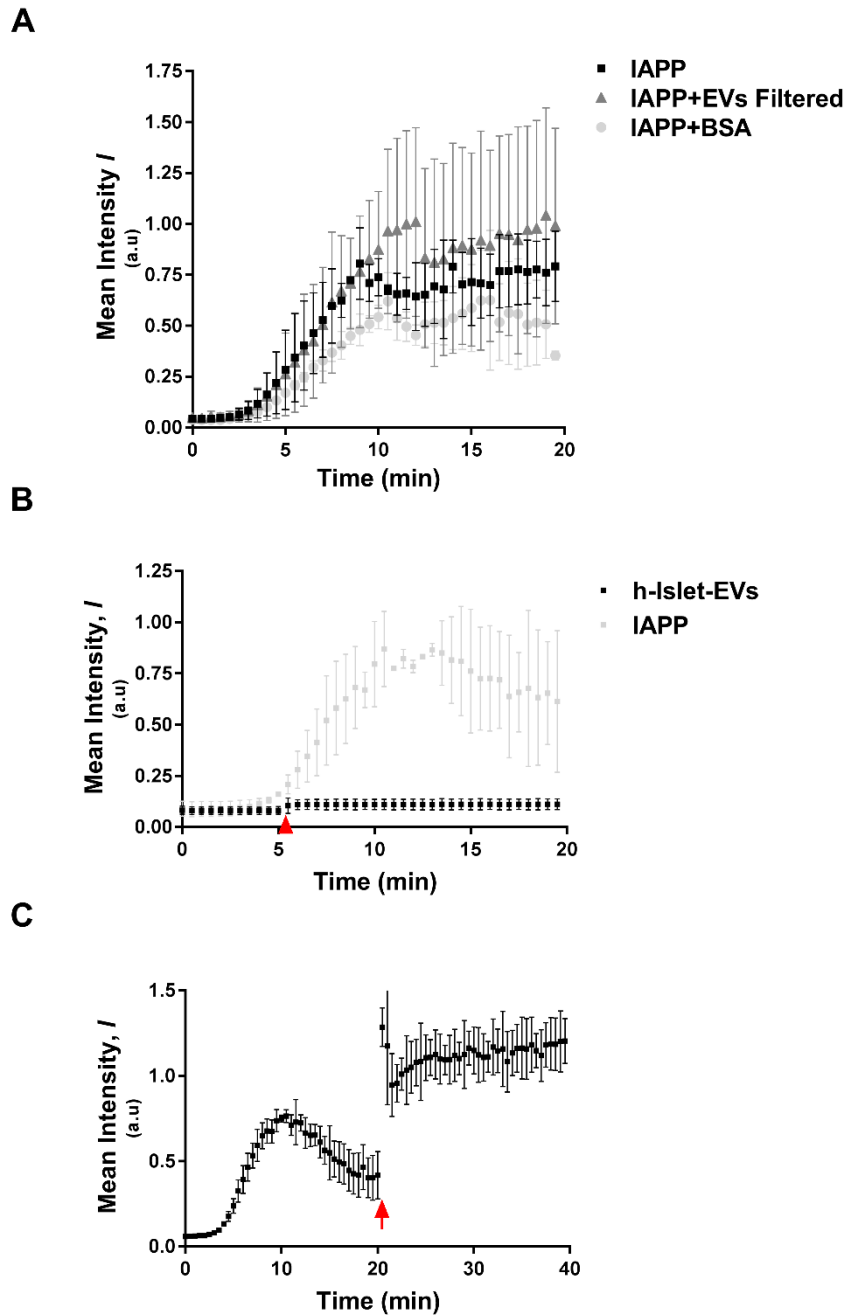

**Figure S1. Control aggregation experiments with EV media, BSA and EVs.** A) ThT fluorescence of IAPP amyloid formation in the presence of filtered EV solution (removing the EVs but retaining everything in solution) and BSA at 25  $\mu\text{g}/\text{mL}$ . B) ThT fluorescence of human islet EVs incubated without IAPP (added at red arrow) and IAPP alone for comparison. C) ThT fluorescence of IAPP amyloid formation without EVs for 20 min followed by EV addition at red arrow (i.e., after amyloid formation). There is an instant jump in the ThT signal, likely related to solubilization of precipitated amyloids, but then the signal remains rather constant. This indicates that EVs cannot dissolve pre-formed IAPP amyloids. For all, data is displayed as  $\text{mean} \pm \text{SD}$ .

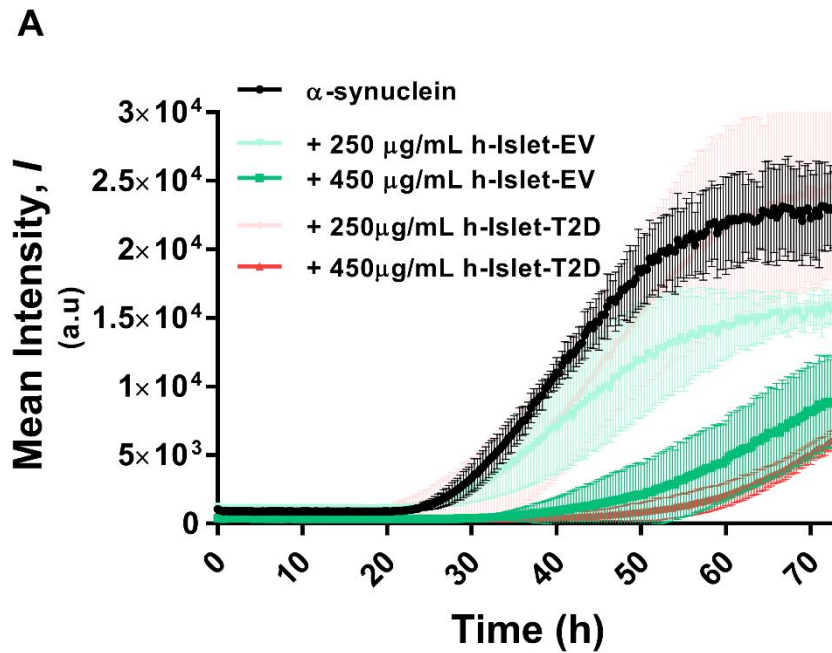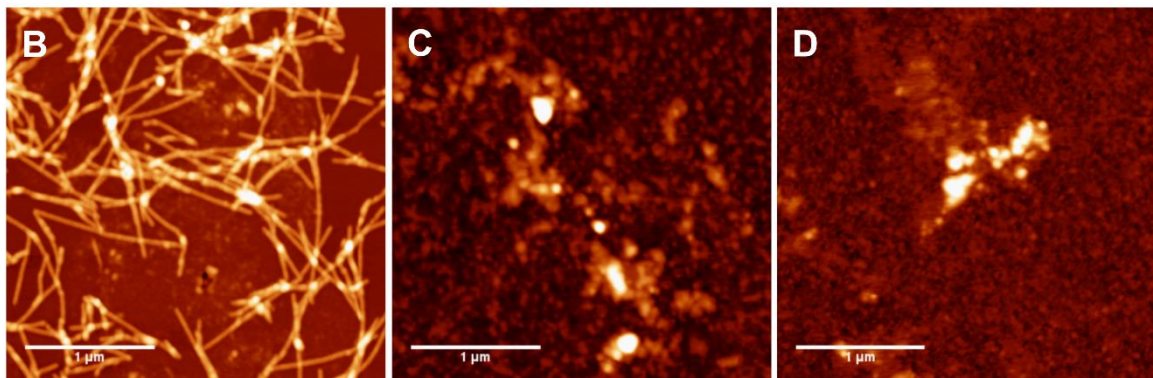

**Figure S2. Aggregation of  $\alpha$ -synuclein in the presence of pancreatic EVs.** A) ThT fluorescence versus time (h), using EV concentrations of 250  $\mu\text{g}/\text{mL}$  and 450  $\mu\text{g}/\text{mL}$ . No significant differences are detected upon EV additions at 250  $\mu\text{g}/\text{mL}$ . When the EV concentration is raised to 450  $\mu\text{g}/\text{mL}$  (giving the same EV-to-protein ratio as in the IAPP experiments), retardation of amyloid formation is observed for both healthy and T2D pancreatic EVs. Data is displayed as mean  $\pm$  SD. AFM images of samples after aggregation experiments (i.e., at 80 h) for  $\alpha$ -synuclein alone (B),  $\alpha$ -synuclein with 450  $\mu\text{g}/\text{mL}$  h-islet-EVs (C) and  $\alpha$ -synuclein with 450  $\mu\text{g}/\text{mL}$  h-T2D-EVs (D). In C and D, the visible particles have heights of approx 30-50 nm which imply that they are exosomes but they could also be non-fibrillar protein aggregates.

**A**

|                   | SE         | TAG       | CH        | PE        | PC        | SM        | SUM<br>(mg/L) |         |
|-------------------|------------|-----------|-----------|-----------|-----------|-----------|---------------|---------|
| <b>h-Islet-EV</b> | 42,3±9,2   | 23,1±4,3  | 12,4±2,5  | 25,8±4,3  | 24,3±4,4  | 6,5±1,1   | 134,4±11,8    | mean±SD |
|                   | <b>100</b> | <b>55</b> | <b>29</b> | <b>61</b> | <b>57</b> | <b>15</b> | <b>%</b>      |         |
| <b>h-T2D-EV</b>   | 34,2±0,2   | 19,7±0,6  | 8,8±0,8   | 21,7±0,2  | 18,7±0,2  | 4,5±0,1   | 107,6±10,5    | mean±SD |
|                   | <b>100</b> | <b>58</b> | <b>26</b> | <b>64</b> | <b>55</b> | <b>13</b> | <b>%</b>      |         |
| <b>h-Ctr-EV</b>   | 30,6±1,2   | 15,3±0,5  | 5,3±0,4   | 13,4±0,8  | 9,2±1,0   | 2,8±0,2   | 76,6±9,9      | mean±SD |
|                   | <b>100</b> | <b>50</b> | <b>17</b> | <b>44</b> | <b>30</b> | <b>9</b>  | <b>%</b>      |         |

**B**

|                                | SE  | TAG | CH | PE | PC | SM |
|--------------------------------|-----|-----|----|----|----|----|
| <b>h-Islet-EV vs. h-T2D-EV</b> | Ns  | Ns  | Ns | Ns | Ns | Ns |
| <b>h-Islet-EV vs. h-Ctr-EV</b> | *** | Ns  | Ns | Ns | ** | Ns |
| <b>h-T2D-EV vs. h-Ctr-EV</b>   | **  | Ns  | Ns | Ns | Ns | Ns |

**Figure S3. EV lipid identification and quantification.** A) Quantification of six classes of lipids identified in the different EV samples. Concentrations detected are given in mg/ml of each lipid as well as relative amount of each lipid with the most abundant lipid (SE in each case) set to 100 %. B) 2 way-ANOVA statistical analysis of data in A. Samples from one donor per condition were measured in triplicate. \*Represents statistical significance, Ns represents No significance. Steryl ester (SE), triacylglycerol (TAG), cholesterol (CH), phosphatidylethanolamine (PE), sphingomyelin (SM), and phosphatidylcholine (PC).

**Table S1. Information of the h-Islets donors from which samples were used for EVs isolation.**

| <b>#Batch</b> | <b>Diabetic</b> | <b>Gender</b> | <b>Age</b>  | <b>BMI</b>  | <b>COD - cause of death</b> |
|---------------|-----------------|---------------|-------------|-------------|-----------------------------|
| 1             | No              | Male          | 29          | 22,4        | Head trauma                 |
| 2             | No              | Female        | 69          | 22,7        | Stroke                      |
| 3             | No              | Male          | 23          | 24,8        | Anoxia event                |
| 4             | No              | Male          | 38          | 23,2        | Stroke                      |
|               |                 |               | <b>40,3</b> | <b>23,3</b> |                             |
| 1             | Yes             | Female        | 55          | 29,8        | Anoxia event                |
| 2             | Yes             | Female        | 42          | 27,6        | Motor vehicle trauma        |
| 3             | Yes             | Female        | 56          | 29,5        | Stroke                      |
|               |                 |               | <b>51,0</b> | <b>29,0</b> |                             |

**Table S2. P-value description.**

| <b>P-value</b>  | <b>Wording</b>        | <b>Symbol summary</b> |
|-----------------|-----------------------|-----------------------|
| < 0.0001        | Extremely significant | ****                  |
| 0.0001 to 0.001 | Extremely significant | ***                   |
| 0.001 to 0.01   | Very significant      | **                    |
| 0.01 to 0.05    | Significant           | *                     |
| ≥ 0.05          | Not significant       |                       |
